# Supplementary material for: Facile fabrication of hierarchical N-doped GaZn mixed oxides for water splitting reactions
Source: Royal Society of Chemistry journal article supplement (doi:10.1039/c0jm01098g), 2010-01-01
Supplement: c0jm01098g.pdf [file c0jm01098g.pdf]

## Supporting Information

### Facile fabrication of hierarchical N-doped GaZn mixed oxides for water splitting reaction

K.M. Parida<sup>‡</sup>, S. Martha, D.P. Das and N. Biswal

*Colloids and Materials Chemistry Department, Institute of Minerals and Materials Technology (CSIR), Bhubaneswar – 751 013, Orissa, INDIA*

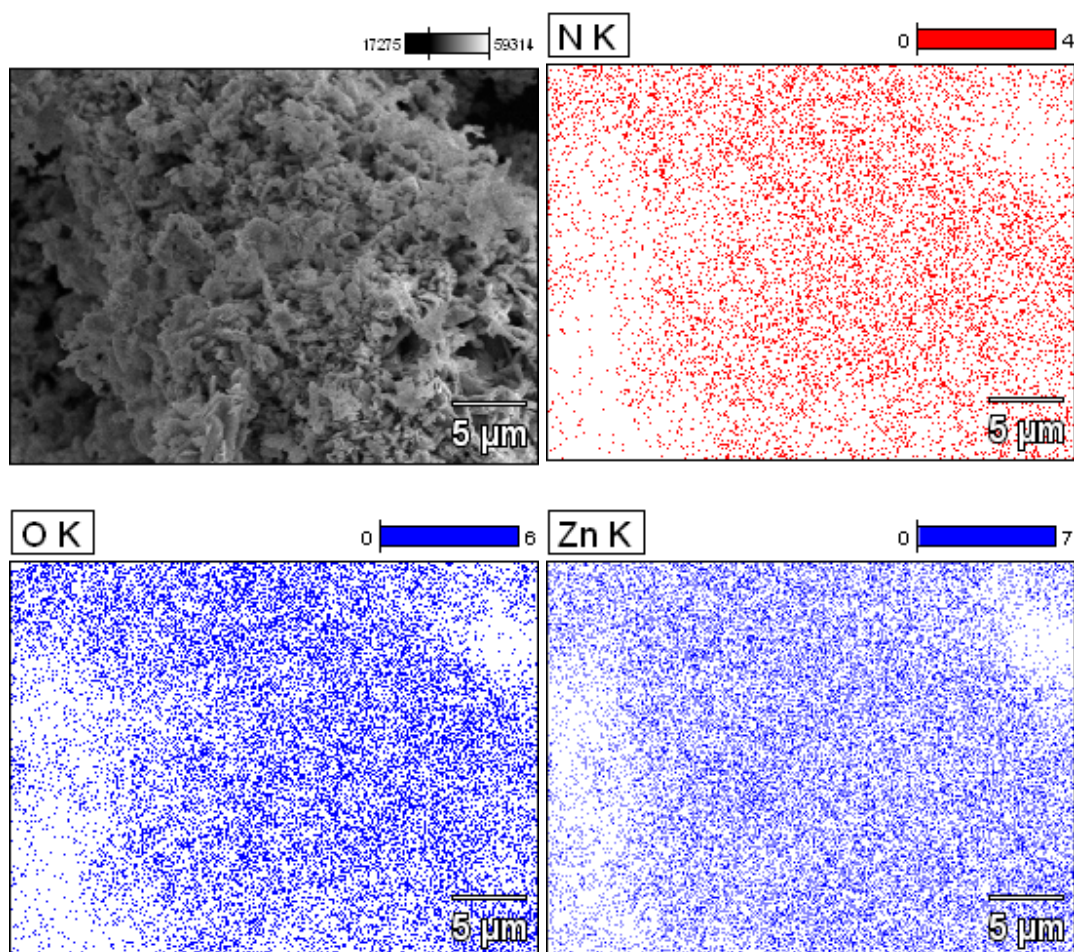

<sup>‡</sup>Corresponding author

E-mail: paridakulamani@yahoo.com

Tel. No. +91-674-2581636 (Ext. 425)

Fax. +91-674-2581637

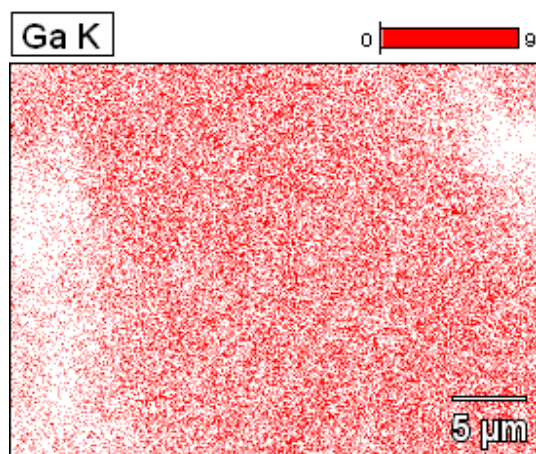

**Fig. S1** X-ray mapping of N-GaZn mixed oxide (glycine as N-precursor) activated at 500 °C.

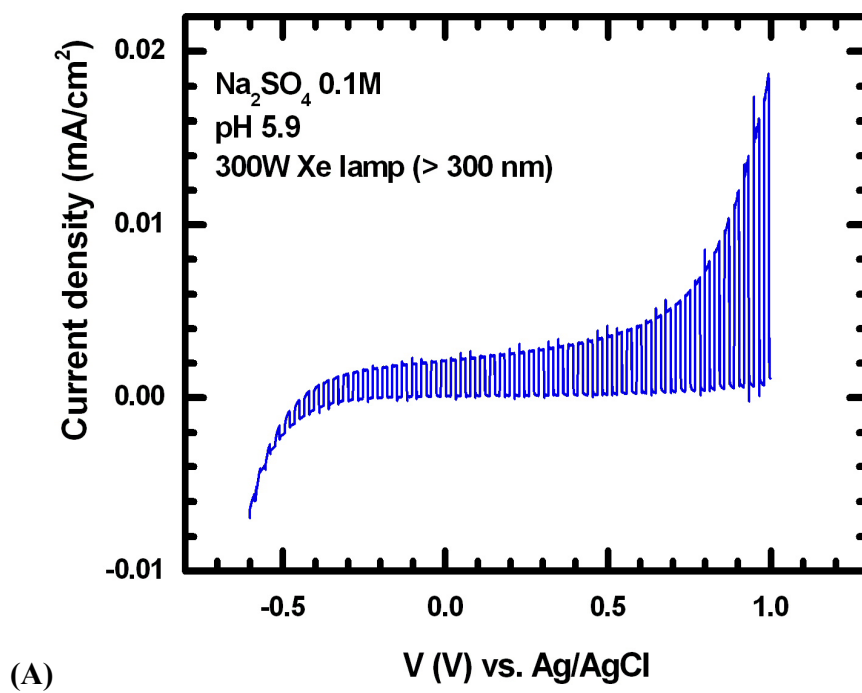

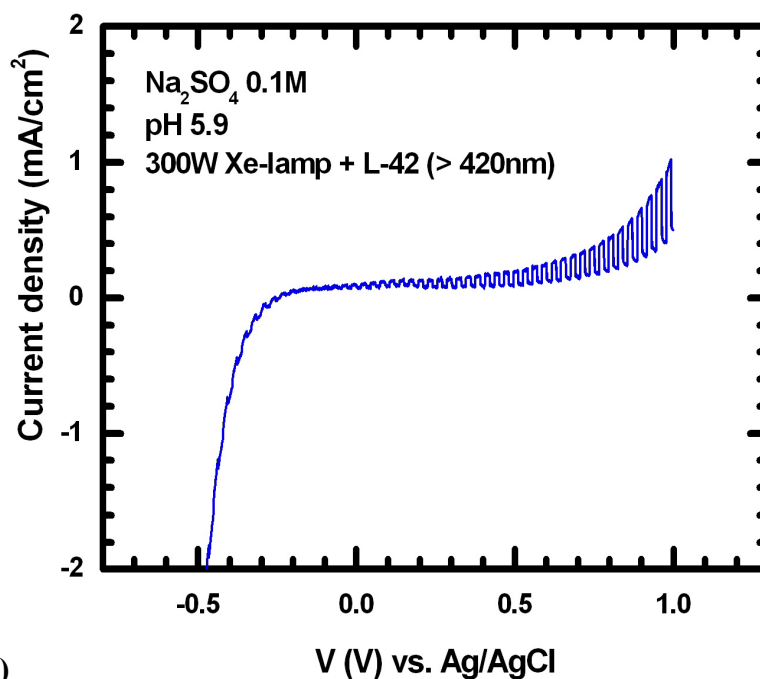

(B)  
**Fig. S2** Current voltage curves for N-GaZn mixed oxide (glycine as N-precursor) electrodes under (A) UV irradiation (> 300 nm) (B) visible irradiation (> 420 nm) in 0.1 M Na<sub>2</sub>SO<sub>4</sub> (pH 5.9).

Fig S2 (A) depicts the current-voltage curves of N-doped GaZn mixed oxide electrodes under UV irradiation. Anodic photocurrent was clearly observed the electrode and exhibited highest photocurrent of 0.016 mA/cm<sup>2</sup> at 0.95 V vs. Ag/AgCl. The presence of anodic photocurrent indicates that the photocatalysts are n-type semiconductors.

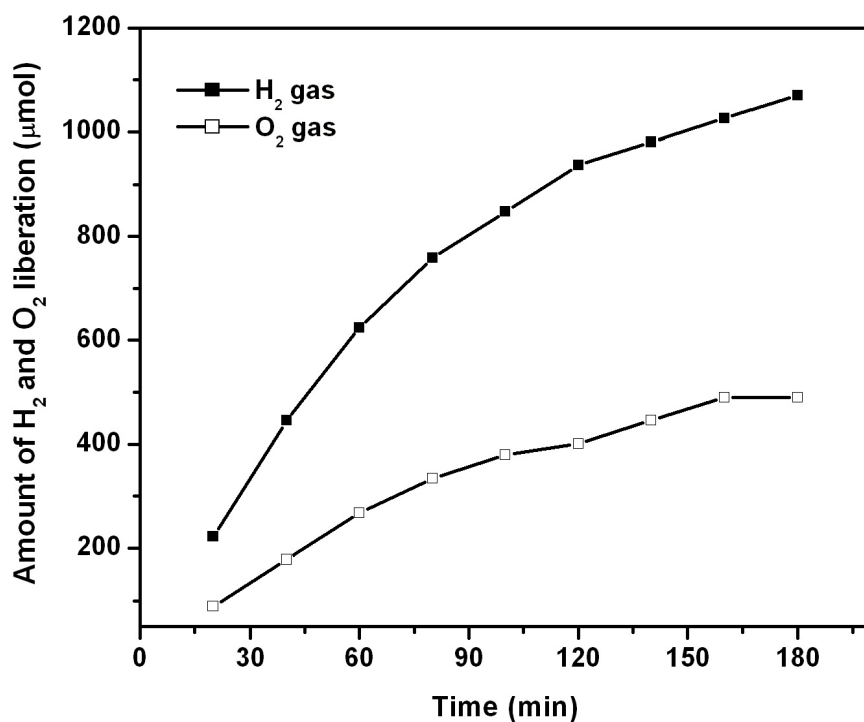

Fig. S3 Water splitting reaction without sacrificial agent over N-doped GaZn mixed oxide using glycine as precursor.

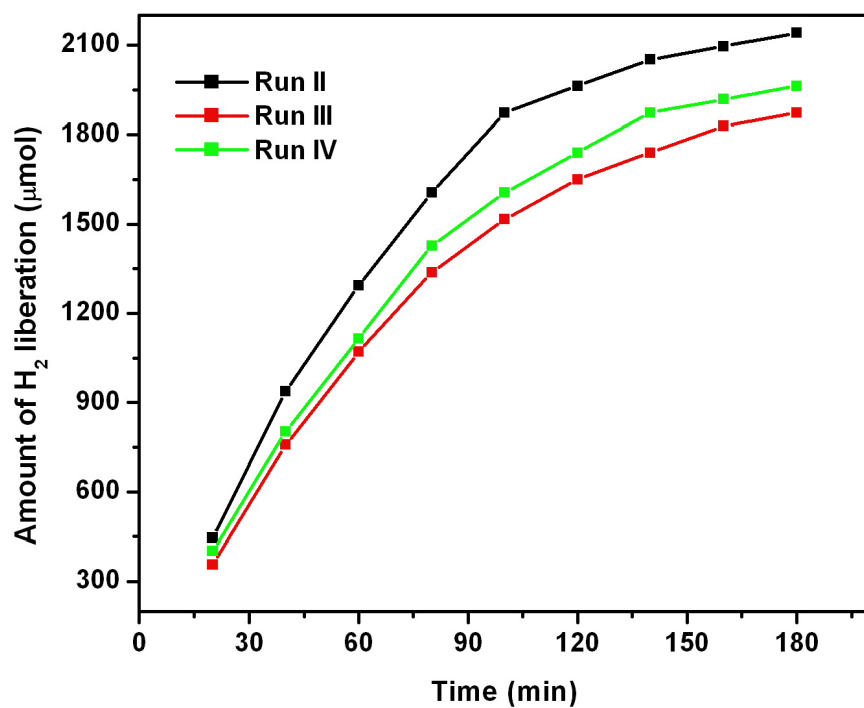

Fig. S4 Reusability study over N-doped GaZn mixed oxide using glycine as precursor.
